# Supplementary material for: Whole-body analysis of TRPML3 (MCOLN3) expression using a GFP-reporter mouse model reveals widespread expression in secretory cells and endocrine glands
Source: PubMed Central journal article supplement (PMC10045552; doi:10.1371/journal.pone.0278848), 2022-12-15
Supplement: pone.0278848.s001.pdf [file pone.0278848.s001.pdf]

## Supporting Information

### Whole-body analysis of TRPML3 expression using a GFP-reporter mouse model reveals widespread expression in secretory cells and endocrine glands

Barbara Spix<sup>1¶</sup>, Andrew J. Castiglioni<sup>2¶</sup>, Natalie N. Remis<sup>2,3¶</sup>, Emma N. Flores<sup>2,4</sup>, Philipp Wartenberg<sup>5</sup>, Amanda Wyatt<sup>5</sup>, Ulrich Boehm<sup>5</sup>, Thomas Gudermann<sup>1</sup>, Martin Biel<sup>6</sup>, Jaime García-Añoveros<sup>2,3,4,7\*</sup>, Christian Grimm<sup>1\*</sup>

#### Supplementary Figures

Figure S1. In situ on P2 *Trpml3*<sup>+/+</sup> kidney with 3' *Trpml3* probe.

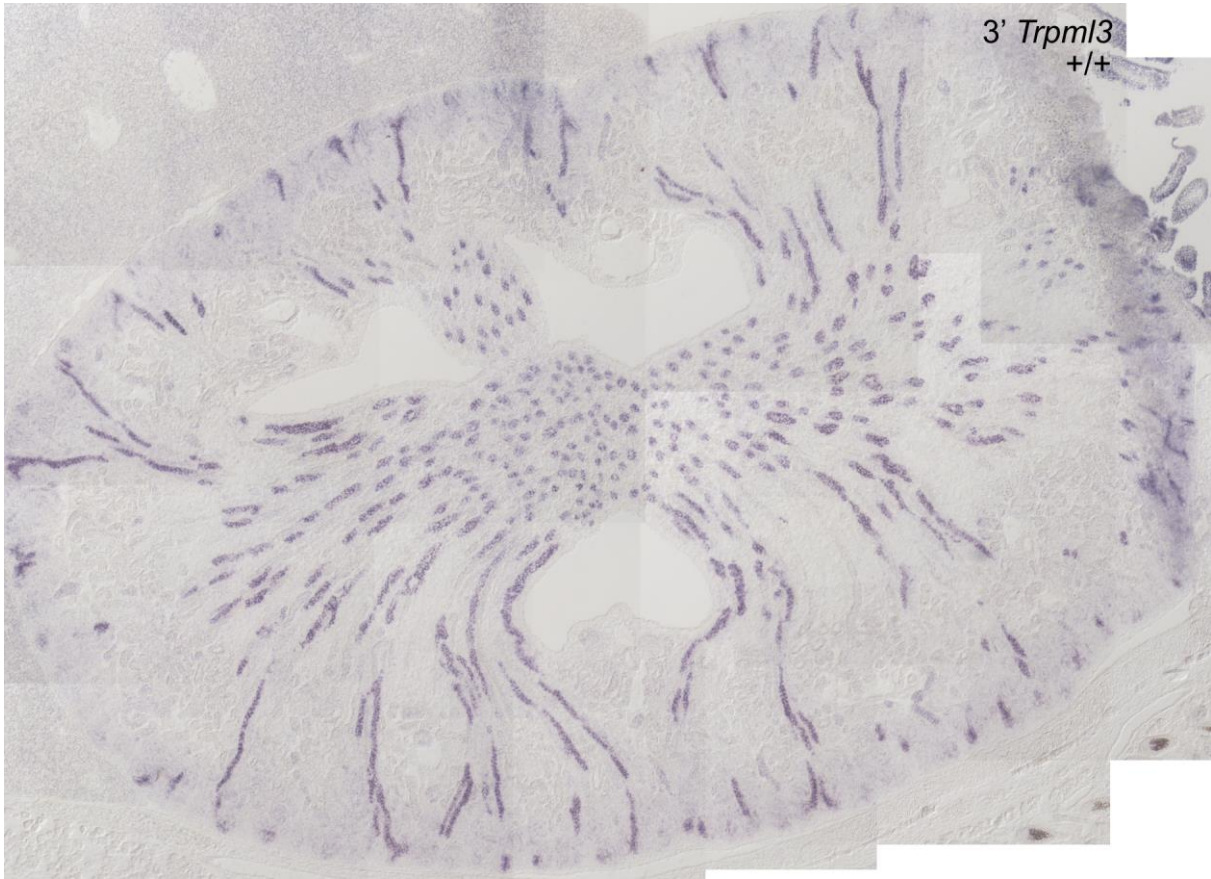

Figure S1. In situ on P2 *Trpm13*<sup>+/+</sup> kidney with 3' *Trpm13* probe.
